# Supplementary material for: Heterogeneous graph inference based on similarity network fusion for predicting lncRNA–miRNA interaction
Source: Royal Society of Chemistry journal article supplement (doi:10.1039/c9ra11043g), 2020-01-01
Supplement: c9ra11043g1.pdf [file c9ra11043g1.pdf]

# Heterogeneous graph inference based on similarity network fusion for predicting lncRNA-miRNA interaction

Yongxian Fan<sup>\*</sup>, Juan Cui, QingQi Zhu

<sup>\*</sup>School of Computer and Information Security, Guilin University of Electronic Technology, Guilin 541004, China. Email: yongxian.fan@gmail.com

**Theorem 1.** When  $WL$  and  $WM$  are properly normalized utilizing formula (2) and formula (3) respectively, it is guaranteed that formula (1) will converge.

$$W_{i+1} = \lambda WL \times W_i \times WM + (1 - \lambda) W_0 \quad (1)$$

$$WL(l_i, l_j) = \frac{WL(l_i, l_j)}{\sqrt{\sum_{n=1}^{nl} WL(l_i, l_n)} \sqrt{\sum_{n=1}^{nl} WL(l_j, l_n)}} \quad (2)$$

$$WM(m_i, m_j) = \frac{WM(m_i, m_j)}{\sqrt{\sum_{n=1}^{nm} WM(m_i, m_n)} \sqrt{\sum_{n=1}^{nm} WM(m_j, m_n)}} \quad (3)$$

## Proof of Theorem 1

In this section, we denote  $WL$ ,  $WM$  and  $W$  to  $A$ ,  $B$  and  $X$  respectively.  $A$  is  $nl \times nl$  matrices,  $B$  is  $nm \times nm$  matrices and  $X$  is  $nl \times nm$  matrices. Besides, we denote  $A_i$  and  $A^j$  as the  $i$ -th row of  $A$  and  $j$ -th column of  $A$  respectively.  $a_{ij}$  is used to represent the value of  $A(i, j)$ . We use the similar way to define the matrix  $B$  and  $X$ .

After that, according to formula (1), we can obtain:

$$x_{ij} = \lambda A_i X B^j + (1 - \lambda) x_{ij}^0 \quad (4)$$

For  $X^1$ , we can also get:

$$\begin{bmatrix} x_{1,1} \\ \mathbf{M} \\ x_{n,1} \end{bmatrix} = \lambda \begin{bmatrix} a_{1,1}b_{1,1}, \mathbf{L}, a_{1,n}b_{1,1}, \mathbf{L}, a_{1,1}b_{m,1}, \mathbf{L}, a_{1,n}b_{m,1} \\ \mathbf{M} \\ a_{n,1}b_{1,1}, \mathbf{L}, a_{n,n}b_{1,1}, \mathbf{L}, a_{n,1}b_{m,1}, \mathbf{L}, a_{n,n}b_{m,1} \end{bmatrix} \begin{bmatrix} x_{1,1} \\ \mathbf{M} \\ x_{n,1} \\ \mathbf{M} \\ x_{1,m} \\ \mathbf{M} \\ x_{n,m} \end{bmatrix} + (1-\lambda) \begin{bmatrix} x_{1,1}^0 \\ \mathbf{M} \\ x_{n,1}^0 \end{bmatrix} \quad (5)$$

If we use  $A_i \times B^j$  to denote  $[a_{i,1}b_{1,j}, \mathbf{L}, a_{i,n}b_{1,j}, \mathbf{L}, a_{i,1}b_{m,j}, \mathbf{L}, a_{i,n}b_{m,j}]$  and then formula (1) can be written as:

$$\begin{bmatrix} X^1 \\ \mathbf{M} \\ X^m \end{bmatrix} = \lambda \begin{bmatrix} A_1 \times B^1 \\ \mathbf{M} \\ A_n \times B^1 \\ \mathbf{M} \\ A_1 \times B^m \\ \mathbf{M} \\ A_n \times B^m \end{bmatrix} \begin{bmatrix} X^1 \\ \mathbf{M} \\ X^m \end{bmatrix} + (1-\lambda) \begin{bmatrix} X^{10} \\ \mathbf{M} \\ X^{m0} \end{bmatrix} \quad (6)$$

Let  $C$  denote  $[A_1 \times B^1, \mathbf{L}, A_n \times B^1, \mathbf{L}, A_1 \times B^m, \mathbf{L}, A_n \times B^m]^T$  and  $i = sn + t$ ,  $j = rn + \theta$ ,  
 $s = sI \{t > 0\} + (s-1)I \{t = 0\}$ ,  $t = tI \{t > 0\} + nI \{t = 0\}$ ,  $r = rI \{\theta > 0\} + (r-1)I \{\theta = 0\}$ ,  
 $\theta = \theta I \{\theta > 0\} + nI \{\theta = 0\}$ ,  $0 \leq t$ ,  $\theta < n$ .

Then we obtain:  $c_{i,j} = a_{t,\theta} b_{r+1,s+1}$  and  $c_{j,i} = a_{\theta,t} b_{s+1,r+1}$ .

By comparing the above two equations, we can find that  $C$  is a  $nl \times nm$  symmetrical matrix. We use  $X^*$  to represents  $[X^1, \mathbf{L}, X^n]^T$ , the formula (6) can be written:

$$X^* = \lambda CX^* + (1-\lambda)X^{*0} \quad (7)$$

In order to get a converged solution for formula (7),  $C$  can be normalized as  $C^{norm} = D^{-1/2}CD^{-1/2}$ , where  $D$  is a diagonal matrix with  $d_{i,i}$  equals to the sum of the  $i$ -th row of  $C$ . Hence, we can also get

$$c_{i,j}^{norm} = \frac{c_{i,j}}{\sqrt{d_{i,i}d_{j,j}}} \quad \text{and} \quad d_{i,i} = \sum_{u=1}^{nm} c_{i,u} = \sum_{u=1}^{nm} a_{t,\theta_u} b_{r_u+1,s+1} = \sum_{p=1}^n a_{t,p} \sum_{q=1}^m b_{q,s+1} \quad \text{where} \quad u = r_u n + \theta_u. \quad \text{After}$$

incorporating the above equation into  $c_{i,j}^{norm}$ , we can obtain:

$$c_{i,j}^{norm} = \frac{a_{t,\theta} b_{r+1,s+1}}{\sqrt{\sum_{p=1}^n a_{t,p} \sum_{q=1}^m b_{q,s+1}} \sqrt{\sum_{p=1}^n a_{\theta,p} \sum_{q=1}^m b_{q,r+1}}} = \frac{a_{t,\theta}}{\sqrt{\sum_{p=1}^n a_{t,p} \sum_{p=1}^n a_{\theta,p}}} \frac{b_{r+1,s+1}}{\sqrt{\sum_{q=1}^m b_{q,s+1} \sum_{q=1}^m b_{q,r+1}}} \quad (8)$$

Therefore, if we normalize  $A$  and  $B$  as  $a_{i,j}^{norm} = \frac{a_{i,j}}{\sqrt{\sum_{p=1}^n a_{i,p} \sum_{p=1}^n a_{j,p}}}$  and  $b_{i,j}^{norm} = \frac{b_{i,j}}{\sqrt{\sum_{q=1}^m b_{q,i} \sum_{q=1}^m b_{q,i}}}$

We can get  $c_{i,j}^{norm} = a_{t,\theta}^{norm} b_{r+1,s+1}^{norm}$ . Thus, we can rewrite formula (7) as

$$X^* = \lambda C^{norm} X^* + (1-\lambda) X^{*0}.$$
